# Supplementary figures and images for: Proteomic analysis of gemcitabine-induced drug resistance in pancreatic cancer cells
Source: Royal Society of Chemistry journal article supplement (doi:10.1039/c1mb05125c), 2011-09-06

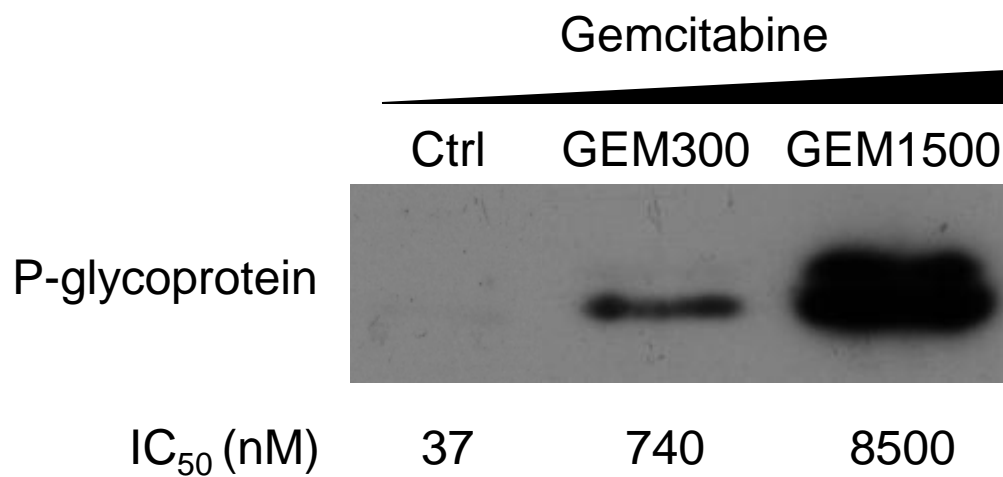

Supplement: c1mb05125c.pdf [file c1mb05125c.pdf]
